# Supplementary material
Source: Royal Society of Chemistry journal article supplement (doi:10.1039/d6ta00771f)
Supplement: d6ta00771f2.xlsx [file d6ta00771f2.xlsx]

## Sheet: descriptor types
total	#	descriptor name	descriptor meaning
			shape asymmetry and size metrics
1	1	tot_dipole	electric dipole moment
2	2	PMI1	gyration ellipsoid, principal semiaxis 1 (short)
3	3	PMI2	gyration ellipsoid, principal semiaxis 1 (medium)
4	4	PMI3	gyration ellipsoid, principal semiaxis 1 (long)
5	5	NPR1	PMI1/PMI3
6	6	NPR2	PMI2/PMI3
7	7	rgyr	gyration radius, unweighted
8	8	eccentricity	sqrt(1-NPR1^2)
9	9	asphericity	.5*((PMI3-PMI2)^2+(PMI2-PMI1)^2+(PMI1-PMI3)^2)/(PMI1^2+PMI2^2+PMI3^2)
10	10	spherosity	3*PMI1/(PMI1+PMI2+PMI3)
		***.mass	the same as above, atomic-Z weighted
		***.coord	equal weigth for all atoms
			partial atomic charges and spin densities
20	1	charge_C0	Mulliken charge
21	2	spin_C0	atomic spin density
22	3	charge_C1	Mulliken charge
23	4	spin_C1	atomic spin density
24	5	charge_C2	Mulliken charge
25	6	spin_C2	atomic spin density
26	7	charge_C3	Mulliken charge
27	8	spin_C3	atomic spin density
28	9	charge_C4	Mulliken charge
29	10	spin_C4	atomic spin density
30	11	charge_C5	Mulliken charge
31	12	spin_C5	atomic spin density
32	13	charge_C6	Mulliken charge
33	14	spin_C6	atomic spin density
34	15	charge_C7	Mulliken charge
35	16	spin_C7	atomic spin density
36	17	charge_C8	Mulliken charge
37	18	spin_C8	atomic spin density
38	19	charge_C9	Mulliken charge
39	20	spin_C9	atomic spin density
40	21	charge_O10	Mulliken charge
41	22	spin_O10	atomic spin density
42	23	charge_C11	Mulliken charge
43	24	spin_C11	atomic spin density
44	25	charge_C12	Mulliken charge
45	26	spin_C12	atomic spin density
46	27	charge_C13	Mulliken charge
47	28	spin_C13	atomic spin density
48	29	charge_C14	Mulliken charge
49	30	spin_C14	atomic spin density
50	31	charge_C15	Mulliken charge
51	32	spin_C15	atomic spin density
52	33	charge_O16	Mulliken charge
53	34	spin_O16	atomic spin density
54	35	charge_C17	Mulliken charge
55	36	spin_C17	atomic spin density
56	37	charge_H2	Mulliken charge
57	38	spin_H2	atomic spin density
58	39	charge_H5	Mulliken charge
59	40	spin_H5	atomic spin density
60	41	charge_H11	Mulliken charge
61	42	spin_H11	atomic spin density
62	43	charge_H17	Mulliken charge
63	44	spin_H17	atomic spin density
			average charge and spin densities and their variances over the arene ring and quinoid fragment
64	1	charge_ring_avg	charge average
65	2	charge_ring_stdev	charge standard deviation
66	3	spin_ring_avg	spin density average
67	4	spin_ring_stdev	spin density standard deviation
			average charge and spin densities and their variances over the quinoid fragment
68	5	charge_ring+O_avg	charge average
69	6	charge_ring+O_stdev	charge standard deviation
70	7	spin_ringwO_avg	spin density average
71	8	spin_ringwO_stdev	spin density standard deviation
			atom counts
72	1	nH11	alpha proton count
73	2	nH17	alpha proton count
74	3	nH	total proton atom count
75	4	nC	total carbon atom count
		atom labeling is as in Figure 1, with 11 corresponding to methyl in asymmetric molecules
		all distances are in Angstroms and all angles are in degrees
			geometry parameters
76	1	d(12-1-0-16)	dihedral angle
77	2	d(1-0-16-17)	dihedral angle
78	3	d(5-0-16-17)	dihedral angle
79	4	a(0-16-17)	bond angle
80	5	a(0-1-12)	bond angle
81	6	r(0-16)	bond length
82	7	r(16-17)	bond length
83	8	r(0-1)	bond length
84	9	r(0-5)	bond length
85	10	r(4-5)	bond length
86	11	r(4-5)	bond length
87	12	d(6-4-3-10)	dihedral angle
88	13	d(4-3-10-11)	dihedral angle
89	14	d(2-3-10-11)	dihedral angle
90	15	a(3-10-11)	bond angle
91	16	a(3-4-6)	bond angle
92	17	r(3-10)	bond length
93	18	r(10-11)	bond length
94	19	r(4-6)	bond length
95	20	r(3-4)	bond length
96	21	r(3-2)	bond length
97	22	r(5-H5)	the shortest C-H distance (metric of hindrance)
98	23	r(17-H5)	the shortest C-H distance (metric of hindrance)
99	24	r(2-H2)	the shortest C-H distance (metric of hindrance)
100	25	r(11-H2)	the shortest C-H distance (metric of hindrance)
			additional parameters
101	1	E1/2, computed	computed estimate for redox potential vs Li/Li+

## Sheet: descriptors and measurements
ROM	SMILES	E1/2, calc.	tot_dipole	PMI1.coord	PMI2.coord	PMI3.coord	NPR1.coord	NPR2.coord	rgyr.coord	eccentricity.coord	asphericity.coord	spherosity.coord	PMI1.mass	PMI2.mass	PMI3.mass	NPR1.mass	NPR2.mass	rgyr.mass	eccentricity.mass	asphericity.mass	spherosity.mass	charge_C0	spin_C0	charge_C1	spin_C1	charge_C2	spin_C2	charge_C3	spin_C3	charge_C4	spin_C4	charge_C5	spin_C5	charge_C6	spin_C6	charge_C7	spin_C7	charge_C8	spin_C8	charge_C9	spin_C9	charge_O10	spin_O10	charge_C11	spin_C11	charge_C12	spin_C12	charge_C13	spin_C13
DiMe	COc1cc(C(C)(C)C)c(OC)cc1C(C)(C)C	4.01934	0	1.03017	4.19746	8.36363	0.123173	0.501871	4.55832	0.992385	0.457904	0.22739	0.467765	2.95513	6.25705	0.074758	0.472289	3.5913	0.997202	0.526019	0.144969	-0.585646	0.251539	0.658725	0.112934	-0.00483	-0.031032	-0.585646	0.251539	0.658725	0.112934	-0.00483	-0.031032	0.252625	-0.005938	-0.553259	0.010139	-0.553248	0.010138	-0.471852	0.000303	-0.275628	0.141674	-0.154484	-0.009423	0.252625	-0.005938	-0.553259	0.010139
MeEt	CCOc1cc(C(C)(C)C)c(OC)cc1C(C)(C)C	3.993	0.5506	1.11421	5.09498	7.91798	0.140719	0.64347	4.72655	0.99005	0.38994	0.236611	0.524901	3.62153	6.04189	0.086877	0.599403	3.76513	0.996219	0.459806	0.15456	-0.544648	0.254618	0.598792	0.114403	-0.03796	-0.034505	-0.617914	0.262817	0.610108	0.094125	0.077074	-0.025486	0.309293	-0.007933	-0.555659	0.009043	-0.488383	0.000656	-0.549527	0.009556	-0.276761	0.138842	-0.155721	-0.009027	0.233994	-0.005975	-0.55919	0.009288
DiEt	CCOc1cc(C(C)(C)C)c(OCC)cc1C(C)(C)C	3.956	0	1.14756	5.99393	7.62866	0.150427	0.785712	4.85004	0.988621	0.357104	0.233083	0.553545	4.21321	5.98506	0.092488	0.703956	3.88952	0.995714	0.427201	0.154452	-0.367723	0.254902	0.383719	0.096773	-0.017754	-0.016131	-0.367723	0.254902	0.383719	0.096773	-0.017754	-0.016131	0.329885	-0.010843	-0.559947	0.007839	-0.500335	0.000879	-0.558987	0.008853	-0.257996	0.1461	0.021502	-0.005817	0.329885	-0.010843	-0.559947	0.007839
MePr	CCCOc1cc(C(C)(C)C)c(OC)cc1C(C)(C)C	3.99822	2.1915	0.968483	6.27061	8.80125	0.110039	0.712468	4.86498	0.993927	0.407189	0.181134	0.43175	4.35456	6.96567	0.061983	0.625146	3.8484	0.998077	0.479528	0.110215	-0.037039	0.255374	0.574279	0.110055	-0.069421	-0.02798	-0.538423	0.238756	0.239519	0.109765	-0.031594	-0.019953	0.384422	-0.008205	-0.552624	0.009819	-0.515466	0.000607	-0.552625	0.009819	-0.270073	0.140615	-0.157796	-0.009989	0.204444	-0.008454	-0.56313	0.010461
DiPr	CCCOc1cc(C(C)(C)C)c(OCCC)cc1C(C)(C)C	3.96826	0	0.920319	6.19162	11.7818	0.078114	0.525525	5.05338	0.996944	0.497231	0.146131	0.402505	4.41157	9.22664	0.043624	0.478134	3.99477	0.999048	0.559033	0.086001	-0.037469	0.242357	0.259523	0.114162	-0.172433	-0.023659	-0.037469	0.242357	0.259523	0.114162	-0.172433	-0.023659	0.330518	-0.009555	-0.569781	0.010243	-0.505177	0.000711	-0.569996	0.010248	-0.288821	0.144672	0.162281	-0.006425	0.330518	-0.009555	-0.569781	0.010243
MeiPr	COc1cc(C(C)(C)C)c(OC(C)C)cc1C(C)(C)C	3.98516	1.2533	1.17736	5.56728	8.09114	0.145513	0.688071	4.85867	0.989356	0.375286	0.238079	0.561411	3.93274	6.32294	0.08879	0.62198	3.88961	0.99605	0.450798	0.155701	-0.562087	0.2442	0.507096	0.111763	-0.021344	-0.036155	-0.771713	0.270661	0.580702	0.086249	0.317291	-0.010387	0.350117	-0.009361	-0.5507	0.00862	-0.509152	0.00076	-0.545106	0.00918	-0.275833	0.137544	-0.15849	-0.00918	0.223118	-0.007514	-0.453623	0.000312
DiiPr	CC(C)Oc1cc(C(C)(C)C)c(OC(C)C)cc1C(C)(C)C	3.93101	0	1.29227	5.93346	9.17821	0.140797	0.646473	5.09323	0.990038	0.389121	0.236334	0.637578	4.21907	7.27696	0.087616	0.579784	4.11503	0.996154	0.465557	0.157639	-0.390985	0.254424	0.335838	0.089449	0.011766	-0.010896	-0.390989	0.254424	0.335833	0.089449	0.011763	-0.010896	0.341628	-0.011136	-0.563345	0.008298	-0.497152	0.000444	-0.547947	0.008852	-0.246571	0.14853	0.249731	-0.00298	0.341625	-0.011137	-0.563348	0.008298
MesBu	CCC(C)Oc1cc(C(C)(C)C)c(OC)cc1C(C)(C)C	3.97077	2.4793	1.20897	6.15788	8.68389	0.13922	0.709116	5.02169	0.990261	0.377846	0.225966	0.588144	4.32864	6.9703	0.084379	0.621012	4.04828	0.996434	0.455913	0.148433	-0.054338	0.245452	0.590819	0.118898	-0.106909	-0.02411	-0.501539	0.245854	0.317863	0.092553	-0.133578	-0.014046	0.370062	-0.011794	-0.550067	0.009335	-0.5074	0.000665	-0.557099	0.008951	-0.275142	0.137641	-0.157912	-0.009402	0.170471	-0.010146	-0.570733	0.009714
DisBu	CCC(C)Oc1cc(C(C)(C)C)c(OC(C)CC)cc1C(C)(C)C	3.90557	0	1.32801	5.77038	12.0952	0.109797	0.477079	5.33245	0.993954	0.484328	0.207571	0.672291	4.17521	9.62815	0.069826	0.433646	4.3423	0.997559	0.552569	0.139329	0.002938	0.242591	0.219429	0.103555	-0.212774	-0.017093	0.002938	0.242591	0.219429	0.103555	-0.212774	-0.017093	0.308134	-0.012922	-0.570574	0.009078	-0.493353	0.000395	-0.575984	0.008819	-0.260904	0.148645	0.182751	0.00196	0.308134	-0.012922	-0.570574	0.009078
MeBn	COc1cc(C(C)(C)C)c(OCc2ccccc2)cc1C(C)(C)C	4.04315	5.9217	1.29061	5.41781	11.9161	0.108308	0.454662	5.2386	0.994117	0.497547	0.207888	0.631497	3.64372	10.9587	0.057625	0.332496	4.29242	0.998338	0.63256	0.12436	-0.620138	0.251532	0.601212	0.107542	0.129673	-0.026317	-0.773941	0.238364	0.580853	0.11744	0.014711	-0.018787	0.329726	-0.008865	-0.555666	0.009817	-0.491237	0.000708	-0.555679	0.009816	-0.269825	0.141154	-0.159085	-0.00973	0.227969	-0.005214	-0.559441	0.009486
DiBn	CC(C)(C)c1cc(OCc2ccccc2)c(C(C)(C)C)cc1OCc1ccccc1	4.04021	0	1.46999	4.81793	18.421	0.0798	0.261546	5.64509	0.996811	0.662983	0.178477	0.733507	3.09687	18.4512	0.039754	0.167841	4.67178	0.99921	0.791923	0.09876	-0.474279	0.247654	0.396912	0.109641	-0.08461	-0.022273	-0.474279	0.247654	0.396912	0.109641	-0.08461	-0.022273	0.317095	-0.005854	-0.558798	0.009245	-0.482851	0.000518	-0.555614	0.00916	-0.230222	0.143255	0.138197	-0.016625	0.317095	-0.005854	-0.558798	0.009245
average			1.12695	1.17709	5.58303	10.2617	0.120537	0.582363	5.02209	0.992406	0.445134	0.210788	0.564081	3.90475	8.55314	0.0716109	0.512335	4.04078	0.997273	0.527355	0.134038	-0.333765	0.249513	0.466031	0.108107	-0.0533269	-0.0245592	-0.4597	0.249993	0.416653	0.102422	-0.0215213	-0.0190675	0.32941	-0.00930964	-0.55822	0.00922509	-0.503978	0.00149827	-0.549129	0.00850518	-0.266161	0.142607	-0.0171842	-0.00787618	0.267262	-0.00850473	-0.552893	0.00855482
std. dev			1.90096	0.16595	0.489838	3.29236	0.0269107	0.158556	0.27572	0.00310953	0.0938194	0.0314232	0.102894	0.423949	3.79136	0.0196408	0.164529	0.27861	0.0013232	0.112728	0.026459	0.250272	0.00542152	0.146486	0.00886661	0.0964559	0.00791401	0.265246	0.0107099	0.148387	0.0109932	0.150153	0.00515283	0.0251176	0.00208403	0.00730919	0.000735591	0.0102942	0.000147632	0.00963279	0.000503442	0.0169624	0.00420169	0.171934	0.00490606	0.0628041	0.00258813	0.0352008	0.0029487
unit		V vs Li/Li+	Debye	Ang	Ang	Ang							Ang	Ang	Ang
[truncated: 57 more columns]

## Sheet: redox potential, fit
FIT1	including computed E1/2
descriptor	E1/2	avg	std.dev.
r(5-H5)	0.366056	1.07828	0.000305	C-H bond distance in the arene ring
E1/2, calculated	0.702203	3.98279	0.040834	DFT estimate for redox potential, V vs Li/Li+
=y[av]=	0.667136
=y[std]=	0.044277
descriptor	E1/2
r(5-H5)	53.1678		R^2	C-H bond distance in the arene ring
E1/2, calculated	0.761412		0.9621	DFT estimate for redox potential, V vs Li/Li+
offset	-59.6949
compound	E1/2	fit	residue
DiMe	0.723	0.724	-0.0009
MeEt	0.673	0.68	-0.0074
DiEt	0.656	0.651	0.0053
MePr	0.702	0.693	0.0085
DiPr	0.66	0.665	-0.0049
MeiPr	0.643	0.647	-0.0039
DiiPr	0.598	0.609	-0.0108
MesBu	0.648	0.64	0.0084
DisBu	0.594	0.588	0.0051
MeBn	0.71	0.724	-0.014
DiBn	0.731	0.716	0.0146
FIT2	free choice of 2 descriptors
descriptor	E1/2	avg	std. dev.	type
spin_O16	-0.922783	0.147053	0.003566	spin density in oxygen
r(3-10)	0.784018	1.32374	0.000842	C(arene)-O bond length
=y[av]=	0.667136
=y[std]=	0.044277
descriptor	E1/2			type
spin_O16.G98	-11.4575		R^2	spin density in oxygen
r(3-10).G98	41.2228		0.988	C(arene)-O bond length
offset	-52.2163
compound	E1/2	fit	residue
DiMe	0.723	0.728	-0.0053
MeEt	0.673	0.673	-0.0007
DiEt	0.656	0.65	0.007
MePr	0.702	0.693	0.0088
DiPr	0.66	0.668	-0.0071
MeiPr	0.643	0.647	-0.0031
DiiPr	0.598	0.597	0.001
MesBu	0.648	0.649	-0.0006
DisBu	0.594	0.595	-0.0013
MeBn	0.71	0.714	-0.0038
DiBn	0.731	0.726	0.0052

## Sheet: cycling stability, fit
free choice of 3 descriptors for cycling stability (N90)
descriptor	N90	avg	std. dev.	type
charge_C12	-0.734168	0.267262	0.056997	Mulliken charge on tert-butyl carbon
charge_C17	-0.837088	0.129542	0.120294	Mulliken charge on alpha-carbon
r(3-10)	-0.996922	1.32374	0.000842	C(ring)-O bond distance
=y[av]=	214.091
=y[std]=	164.907
descriptor	N90
charge_C12	-2124.15		R^2	Mulliken charge on tert-butyl carbon
charge_C17	-1147.54		0.9669	Mulliken charge on alpha-carbon
r(3-10)	-195224			C(ring)-O bond distance
offset	259357
compound	cycles	fit	residue
DiMe	573	573.416	-0.4156
MeEt	300	277.233	22.7667
DiEt	337	340.099	-3.0995
MePr	255	289.287	-34.2866
DiPr	140	169.409	-29.4094
MeiPr	9	-30.416	39.4161
DiiPr	210	170.39	39.6099
MesBu	160	137.016	22.9836
DisBu	341	322.303	18.6969
MeBn	27	79.776	-52.7759
DiBn	3	26.416	-23.4162

## Sheet: calendar stability, fit
free choice of 3 descriptors for calendar life stability (log(t1/2,s))
descriptor	log(t1/2)	avg	std. dev	type
PMI2.mass	0.829813	3.90475	0.487065	median semiaxis ofmass weighted gyration ellipsoid
charge_C11	0.733455	-0.017184	0.161467	Mulliken charge on alpha-carbon
spin_ring_stdev	1.23351	0.1112	0.003486	standard deviation of spin density in the arene ring
=y[av]=	1.83302
=y[std]=	0.59727
descriptor	log(t1/2)			type
PMI2.mass	1.01757		R^2	median semiaxis ofmass weighted gyration ellipsoid
charge_C11	2.71306		0.9767	Mulliken charge on alpha-carbon
spin_ring_stdev	211.327			standard deviation of spin density in the arene ring
offset	-25.5933
compound	log(t1/2)	fit	residue
DiMe	1.423	1.375	0.0486
MeEt	2.563	2.64	-0.0773
DiEt	2.318	2.244	0.0744
MePr	1.936	1.82	0.1157
DiPr	2.396	2.291	0.1042
MeiPr	2.329	2.417	-0.0873
DiiPr	2.495	2.493	0.0025
MesBu	1.29	1.3	-0.0095
DisBu	1.375	1.574	-0.199
MeBn	0.748	0.788	-0.0397
DiBn	1.29	1.223	0.0673
